# Supplementary material for: Room-temperature fabrication of dual-functional hierarchical TiO2 spheres for dye-sensitized solar cells
Source: Royal Society of Chemistry journal article supplement (doi:10.1039/c3ra47606e), 2014-01-01
Supplement: c3ra47606e1.pdf [file c3ra47606e1.pdf]

Supplementary Information for

5

## **Room-temperature fabrication of dual-functional hierarchical TiO<sub>2</sub> spheres for dye-sensitized solar cells**

**Jia Liang\*, Gengmin Zhang, Huarong Xia and Wentao Sun**

10

15

20

25

30

[\*] Mr. Jia Liang

<sup>35</sup> Key Laboratory for the Physics and Chemistry of Nanodevices and Department of Electronics, Peking University, Beijing 100871, China.

Email: jial@pku.edu.cn

**Preparation of hierarchical TiO<sub>2</sub> spheres.** Hierarchical TiO<sub>2</sub> spheres were prepared by a facile and low-cost method. Typically, a 40 mL mixture aqueous solution, containing 0.05 M ammonium hexafluorotitanate, (NH<sub>4</sub>)<sub>2</sub>TiF<sub>6</sub>, and 0.13 M boric acid, H<sub>3</sub>BO<sub>3</sub>, was transferred into a 100 mL beaker and stand for 2 days. Following, the precipitate was collected by centrifugation after being washed with deionized water several times. Then, the powder was dried naturally at room temperature. Finally, the product was sintered at 450 °C for 30 min with the rate of temperature rising was 2 °C min<sup>-1</sup>.

**Preparation of photoanodes.** Three types of TiO<sub>2</sub> paste, including nanocrystalline-TiO<sub>2</sub> (commercial product, diameter≈25 nm, P25) paste, submicrocrystalline-TiO<sub>2</sub> (commercial product, diameter≈200 nm, P200) paste and submicrocrystalline-TiO<sub>2</sub> (hierarchical TiO<sub>2</sub> spheres, diameter≈500 nm, P500) paste were prepared using the method developed by Ito *et al.*<sup>1</sup> In short, 0.1 mL of acetic acid, 0.5 mL of deionized water, 17 mL of ethanol, 2 g of terpinol and 0.3 g of ethyl cellulose were added into 0.6 g of TiO<sub>2</sub> powder (P25, P200 and P500) in order, and then grinded in a mortar for 5 min, respectively. Ethanol and water were removed by a rotary evaporator. The obtained paste was spread on a clean FTO glass by using the screen printing method. After drying at 120 °C for 5 min, the film was sintered at 450 °C for 30 min with the rate of temperature rising was 2 °C min<sup>-1</sup>. The samples were left to cool naturally after annealing. The thicknesses of the films were detected by the Stylus Profiler.

**Fabrication of DSSCs.** The as-prepared TiO<sub>2</sub> photoanodes were immersed in a 0.3 mM cis-diisothiocyanato-bis(2,20-bipyridyl-4,40-dicarboxylato) ruthenium(II) bis(tetrabutylammonium) (N719, Dalian HeptaChromaSolarTech, China) solution for 24 hr when they cooled from the sintering temperature to about 80 °C to avoid contact with water. Then, the dye-sensitized working electrodes were sandwiched together with Pt-coated FTO glass as counter electrodes using a hot-melt Surlyn spacer, with a spacer thickness of approximately 25 μm. A I<sup>-</sup>/I<sub>3</sub><sup>-</sup> based liquid electrolyte was injected into the holes in the reverse of the counter electrode, and then the holes were sealed using the same hot-melt Surlyn spacer.

**Characterizations an photoelectrochemical measurement.** The morphology and microstructure of the samples were examined by field emission scanning electron microscopy (FE-SEM) and transmission electron microscopy (TEM). The crystallinities of the samples were investigated using X-ray diffraction (XRD). For ensuring the components, the samples were subjected to X-ray photoelectron spectroscopy (XPS). Transmittance spectra of the resulting dye-sensitized TiO<sub>2</sub> films were collected on a UV-vis spectrophotometer (UV 5000 spectrometer, Cary). To estimate the amount of the dye, the sensitized electrodes were dipped into the NaOH solutions (0.2M), which was in a mixed solvent (water:ethanol=1:1). The concentration of desorbed N719 was measured by absorbance using a UV-vis spectrophotometer. The photovoltaic performance of the DSSCs was measured under AM 1.5 simulated sunlight, produced by a 300-W Oriel Solar Simulator (Model, 91160) with the illumination intensity being 100 mW cm<sup>-2</sup>. An electrochemical analyzer was used to record the information of photocurrent and photovoltage. The incident photon to current conversion efficiency (IPCE) spectra was measured as a function of wavelength on the basis of a monochromator.

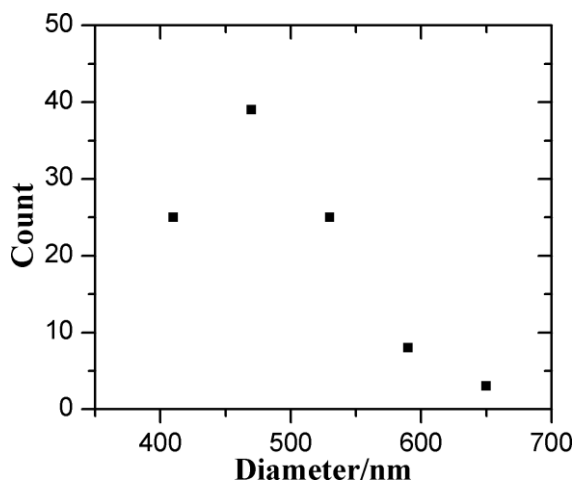

**Figure S1** The diameter distribution of hierarchical TiO<sub>2</sub> spheres (P500) with a total of 100 samples.

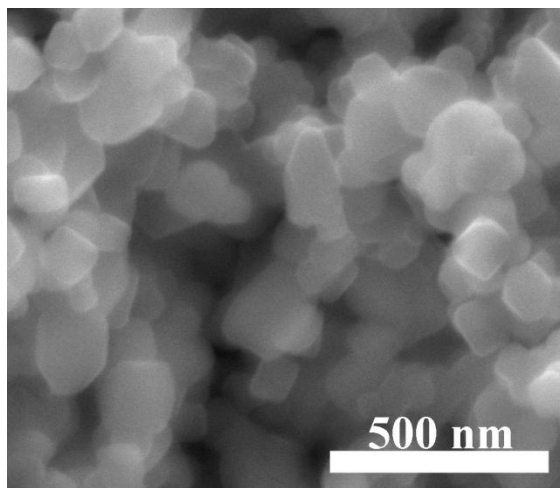

**Figure S2** Typical SEM image of the commercial submicrocrystalline-TiO<sub>2</sub> particles (P200).

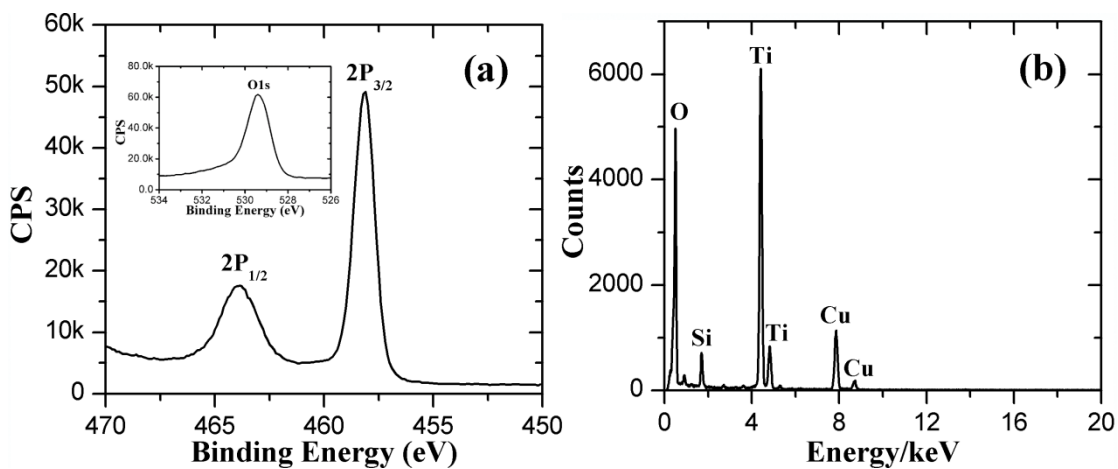

**Figure S3** XPS full spectra of Ti (a) and O (inset in (a)) of the hierarchical TiO<sub>2</sub> spheres (P500); (b) Energy dispersive spectrum (EDS) of P500.

5

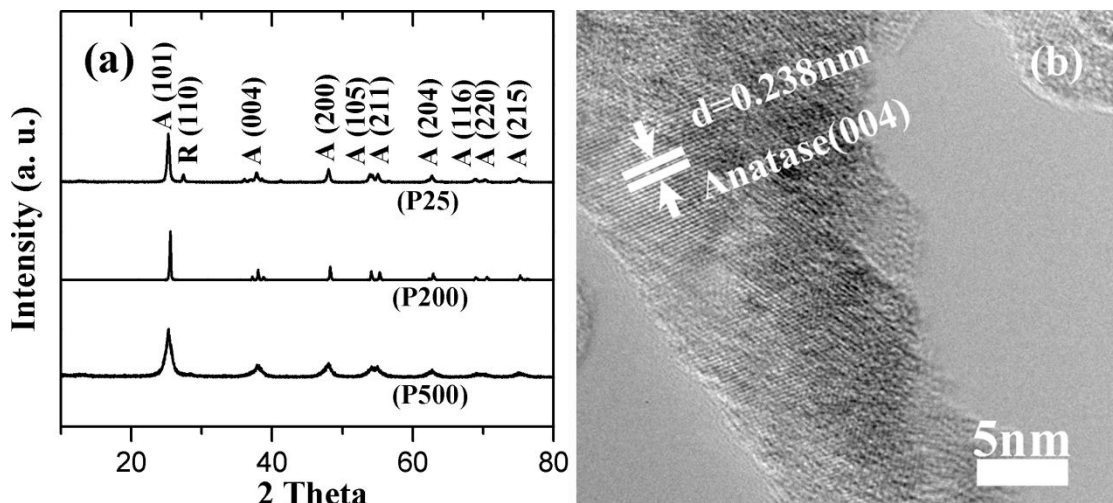

**Figure S4** (a) XRD patterns of P25, P200 and P500, respectively; (b) HRTEM image of P500.

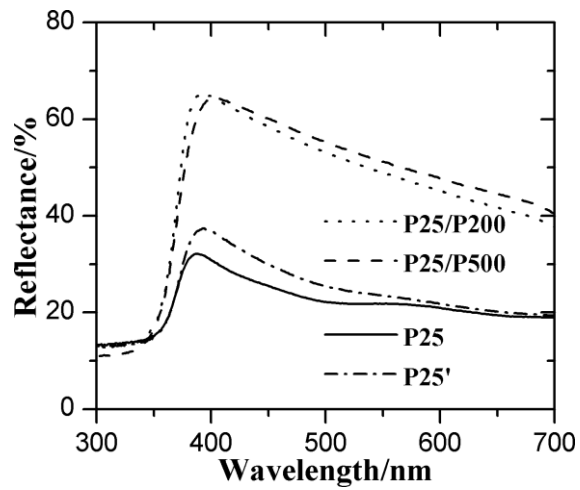

**Figure S5** UV-Vis diffuse reflectance spectra of four different undyed electrodes..

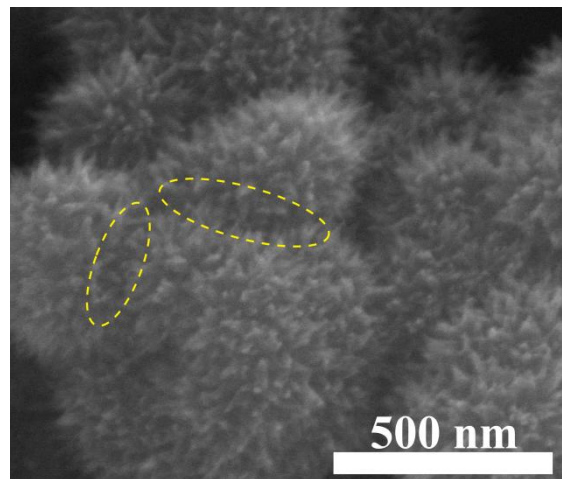

**Figure S6** Junction SEM image between two hierarchical TiO<sub>2</sub> spheres.

5

## Notes and references

- 1 S. Ito, P. Chen, P. Comte, M. K. Nazeeruddin, P. Liska, P. Pechy, M. Gratzel, *Prog. Photovolt: Res. Appl.*, 2007, **15**, 603.
